# Supplementary material
Source: publisher figshare collection journal article supplement (https://gsajournals.figshare.com/articles/dataset/_/7396673)
Supplement: Supplementary file 1 [file 1]

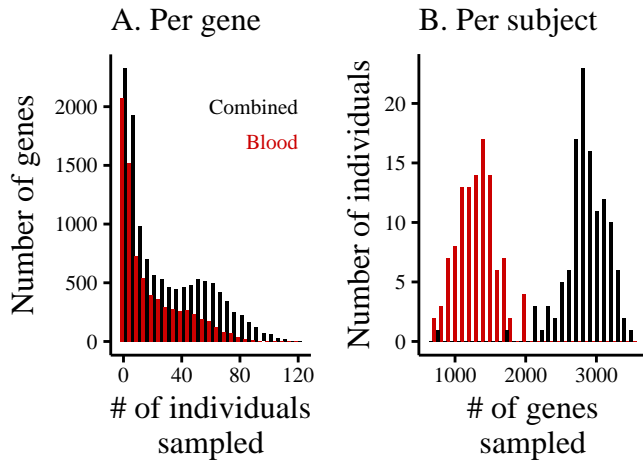

**Figure S7** Summary of ASE sample sizes across tissues. Data from version 6 of the GTEx Project. ‘Combined’ (shown in black) refers to combined-tissue ASE (reads spanning each ASE site in a single individual are summed, regardless of the tissue in which they were sampled). The nine best-sampled GTEx tissues are included. ‘Blood’ (shown in red) are ASE measurements from whole blood alone. (A) Histogram of the number of individuals with measured allelic imbalance per gene. (B) Histogram of the number of genes with measured allelic imbalance per individual.
