# Supplementary material
Source: publisher figshare collection journal article supplement (https://gsajournals.figshare.com/articles/dataset/_/7396673)
Supplement: Supplementary file 2 [file 1]

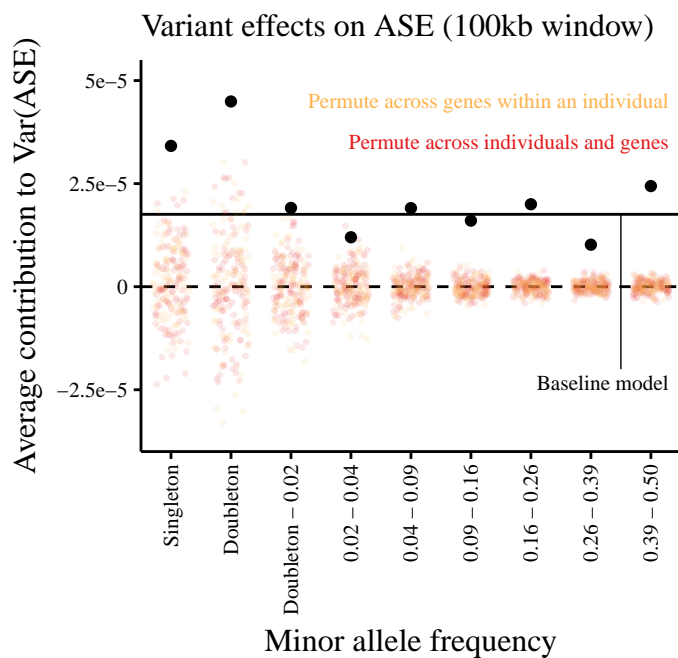

**Figure S5** Effects of *cis*-genetic variants (those within 50kb of the TSS) on allelic imbalance. Variants binned by minor allele frequency in GTEx. Estimates from combined-tissue ASE (reads spanning each ASE site in a single individual are summed, regardless of the tissue in which they were sampled) are shown in black. Colored points represent estimates from 100 permutations of (1) ASE measurements across genes and individuals (red) and (2) ASE measurements across genes within an individual (orange). Horizontal lines mark zero effect (dashed) and the average variant effect estimated by regressing allelic imbalance on the total number of *cis*-heterozygous sites (solid).
