# Supplementary material
Source: publisher figshare collection journal article supplement (https://gsajournals.figshare.com/articles/dataset/_/7396673)
Supplement: Supplementary file 3 [file 1]

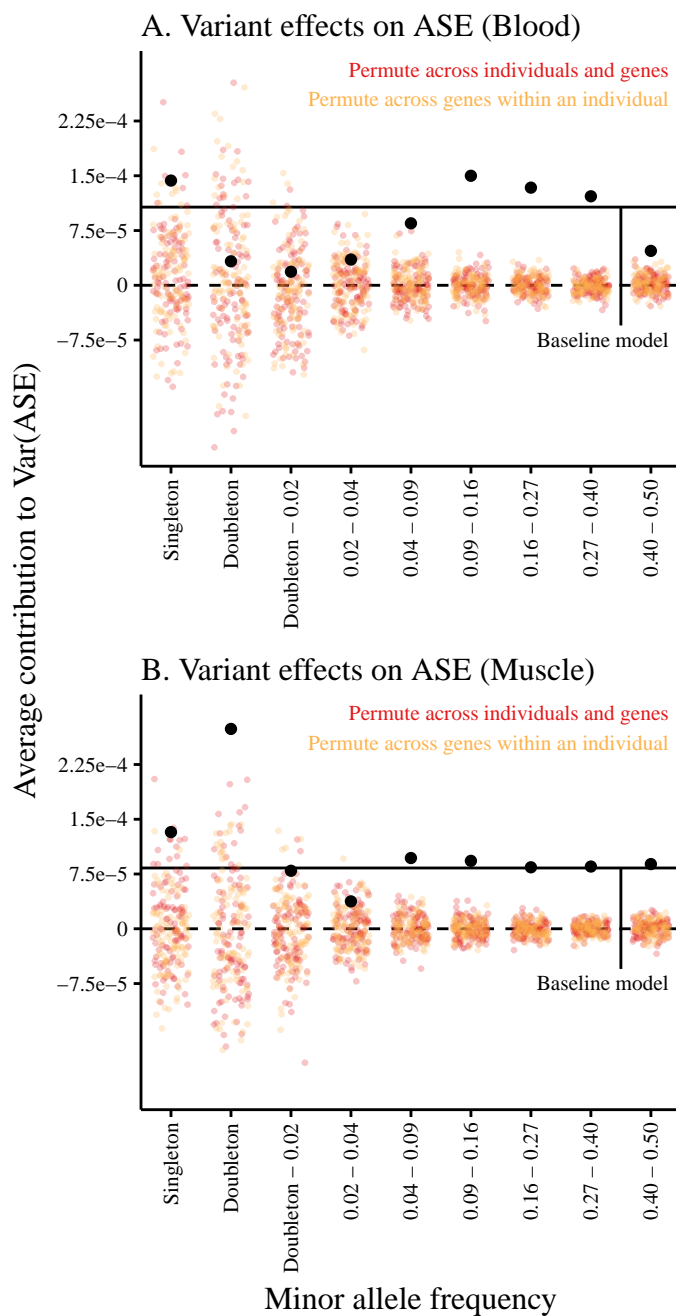

**Figure S6** Effects of *cis*-genetic variants (those within 10kb of the TSS) on allelic imbalance in individual tissues. Variants binned by minor allele frequency in GTEx. Estimates from multiple regression shown in black. Colored points represent estimates from 100 permutations of (1) ASE measurements across genes and individuals (red) and (2) ASE measurements across genes within an individual (orange). Horizontal lines mark zero effect (dashed) and the average variant effect estimated by regressing allelic imbalance on the total number of *cis*-heterozygous sites (solid). (A) Estimates and permutations based on all individual-gene pairs sampled in whole blood. (B) Estimates and permutations based on all individual-gene pairs sampled in skeletal muscle.
