# Supplementary material
Source: publisher figshare collection journal article supplement (https://gsajournals.figshare.com/articles/dataset/_/7396673)
Supplement: Supplementary file 5 [file 1]

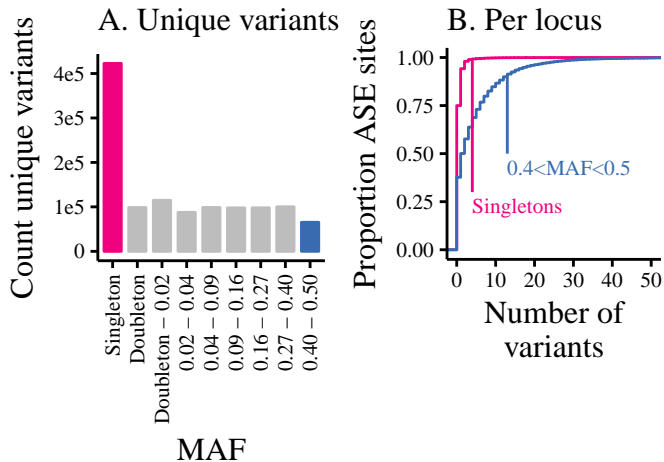

**Figure S9** Summary of allele frequencies of variants (heterozygous in at least one individual) within 10kb of the TSS of genes with measured ASE in version 6 of the GTEx Project. (A) Histogram of the count of unique variants in each allele frequency bin. (B) Cumulative distribution of the number of singletons (pink) and the most common variants ( $0.4 < \text{MAF} < 0.5$ , blue) per individual-gene pair.
