# Supplementary material
Source: publisher figshare collection journal article supplement (https://gsajournals.figshare.com/articles/dataset/_/7396673)
Supplement: Supplementary file 6 [file 1]

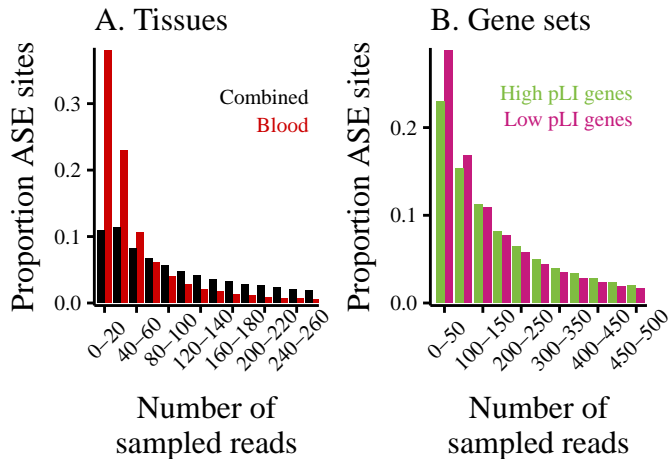

**Figure S8** Summary of ASE read depth across tissues and gene sets. Data from version 6 of the GTEx Project. (A) Histogram of read depth across tissues. ‘Combined’ (shown in black) refers to combined-tissue ASE (reads spanning each ASE site in a single individual are summed, regardless of the tissue in which they were sampled). The nine best-sampled GTEx tissues are included. ‘Blood’ (shown in red) are ASE measurements from whole blood alone. (B) Histogram of read depth for combined-tissue ASE across high- and low-*pLI* genes.
