# Supplementary material
Source: publisher figshare collection journal article supplement (https://gsajournals.figshare.com/articles/dataset/_/7396673)
Supplement: Supplementary file 7 [file 1]

|                                       | Full data                 | Ascertainment<br><i>Validation</i> |
|---------------------------------------|---------------------------|------------------------------------|
| Sample size                           | 922                       | 800<br>122                         |
| Number of eQTLs                       | 6,587                     | 6,145                              |
| Power threshold                       | $1.24\times / 0.81\times$ | $1.27\times / 0.79\times$          |
| Number of eQTLs<br>filtered for power | 2,702                     | 2,333                              |

**Table 1** Summary of data for analysis of the effects of winner's curse and of limited statistical power on eQTL effect size estimates. To understand the impacts of winner's curse, we called eQTLs in an ascertainment set and estimated their effect sizes in a validation set. To explore the impact of variable power to call eQTLs of the same effect across allele frequency bins, eQTLs were filtered to remove those with estimated effects that we would lack power to call at low allele frequencies. Here, we consider eQTLs with estimated effects larger than the minimum magnitude of estimated effect for significant, rare eQTLs (MAF<0.02). Especially rare eQTLs (MAF<0.02) are also excluded. 'Power threshold' shows this effect size cutoff for the different datasets.
