# Supplementary material
Source: publisher figshare collection journal article supplement (https://gsajournals.figshare.com/articles/dataset/_/7396673)
Supplement: Supplementary file 8 [file 1]

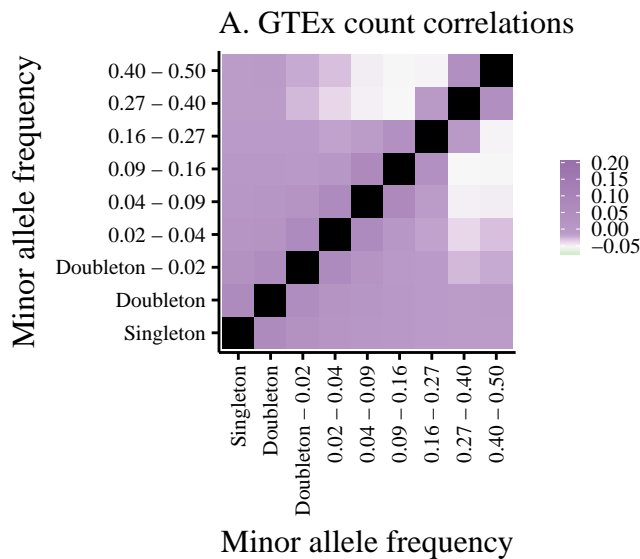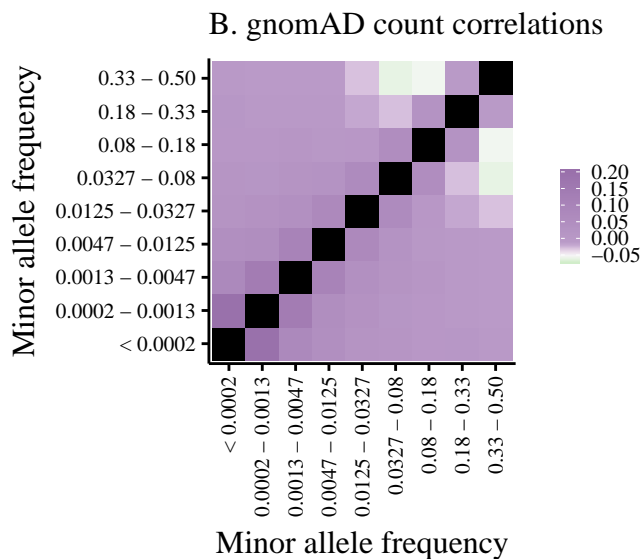

**Figure S3** Pearson correlations between counts of *cis*-heterozygous sites (per individual-gene pair) across allele frequency bins. Here, sites within 10kb of the TSS are considered to be in *cis*. (A) Variants binned according to minor allele frequency in 122 Europeans from GTEx. (B) Variants binned according to minor allele frequency in 7,509 Europeans from gnomAD. Positive correlations in purple, negative correlations in green, variables compared to themselves in black.
