# Supplementary material
Source: publisher figshare collection journal article supplement (https://gsajournals.figshare.com/articles/dataset/_/7396673)
Supplement: Supplementary file 9 [file 1]

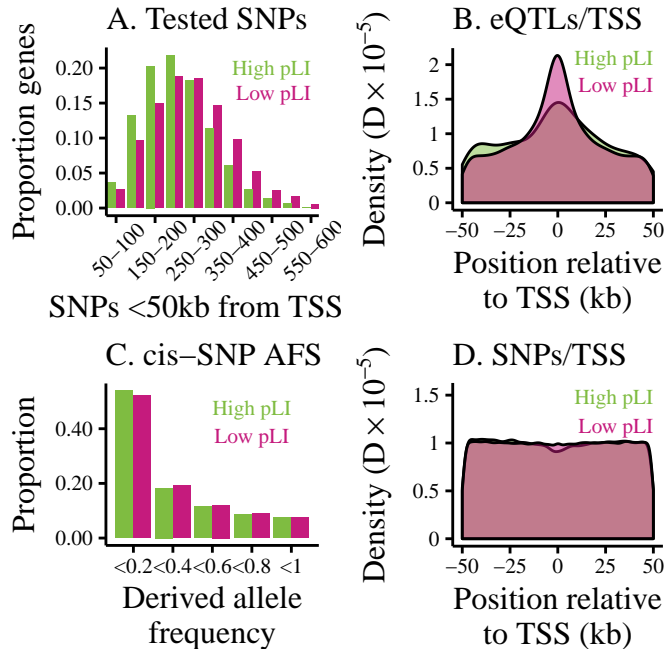

**Figure S2** Profile of candidate eQTLs (SNPs with MAF>0.05 within 50kb of the TSS of an autosomal, protein-coding gene) around high- and low-*pLI* genes. (A) and (C) compare the numbers and allele frequencies of SNPs around high- and low-*pLI* genes, while (B) and (D) compare the distribution of called eQTLs and SNPs around transcription start sites. (A) Histogram of the number of *cis*-SNPs tested as eQTLs per gene. (C) Histogram of the derived allele frequencies of *cis*-SNPs. (B) Density of called eQTLs relative to the TSS. (D) Density of candidate eQTLs relative to the TSS.
