# Supplementary material
Source: publisher figshare collection journal article supplement (https://gsajournals.figshare.com/articles/dataset/_/7396673)
Supplement: Supplementary file 11 [file 1]

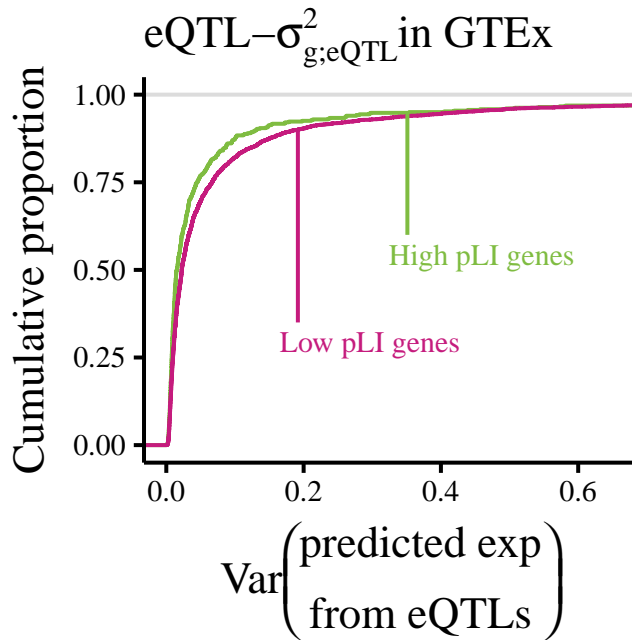

**Figure S10** Cumulative distributions of eQTL-estimated genetic variance by *pLI* class. eQTLs called in DGN were combined with genotypes from version 6 of the GTEx Project to predict the expression of each gene in each of 122 European individuals. Genetic variance was then estimated as the variance of eQTL-predicted expression levels across individuals.
